# Supplementary material
Source: Royal Society of Chemistry journal article supplement (https://www.rsc.org/suppdata/books/085404/9780854041473/bk9780854041473.pdf)
Supplement: Supplementary file 1 [file bk9780854041473.pdf]

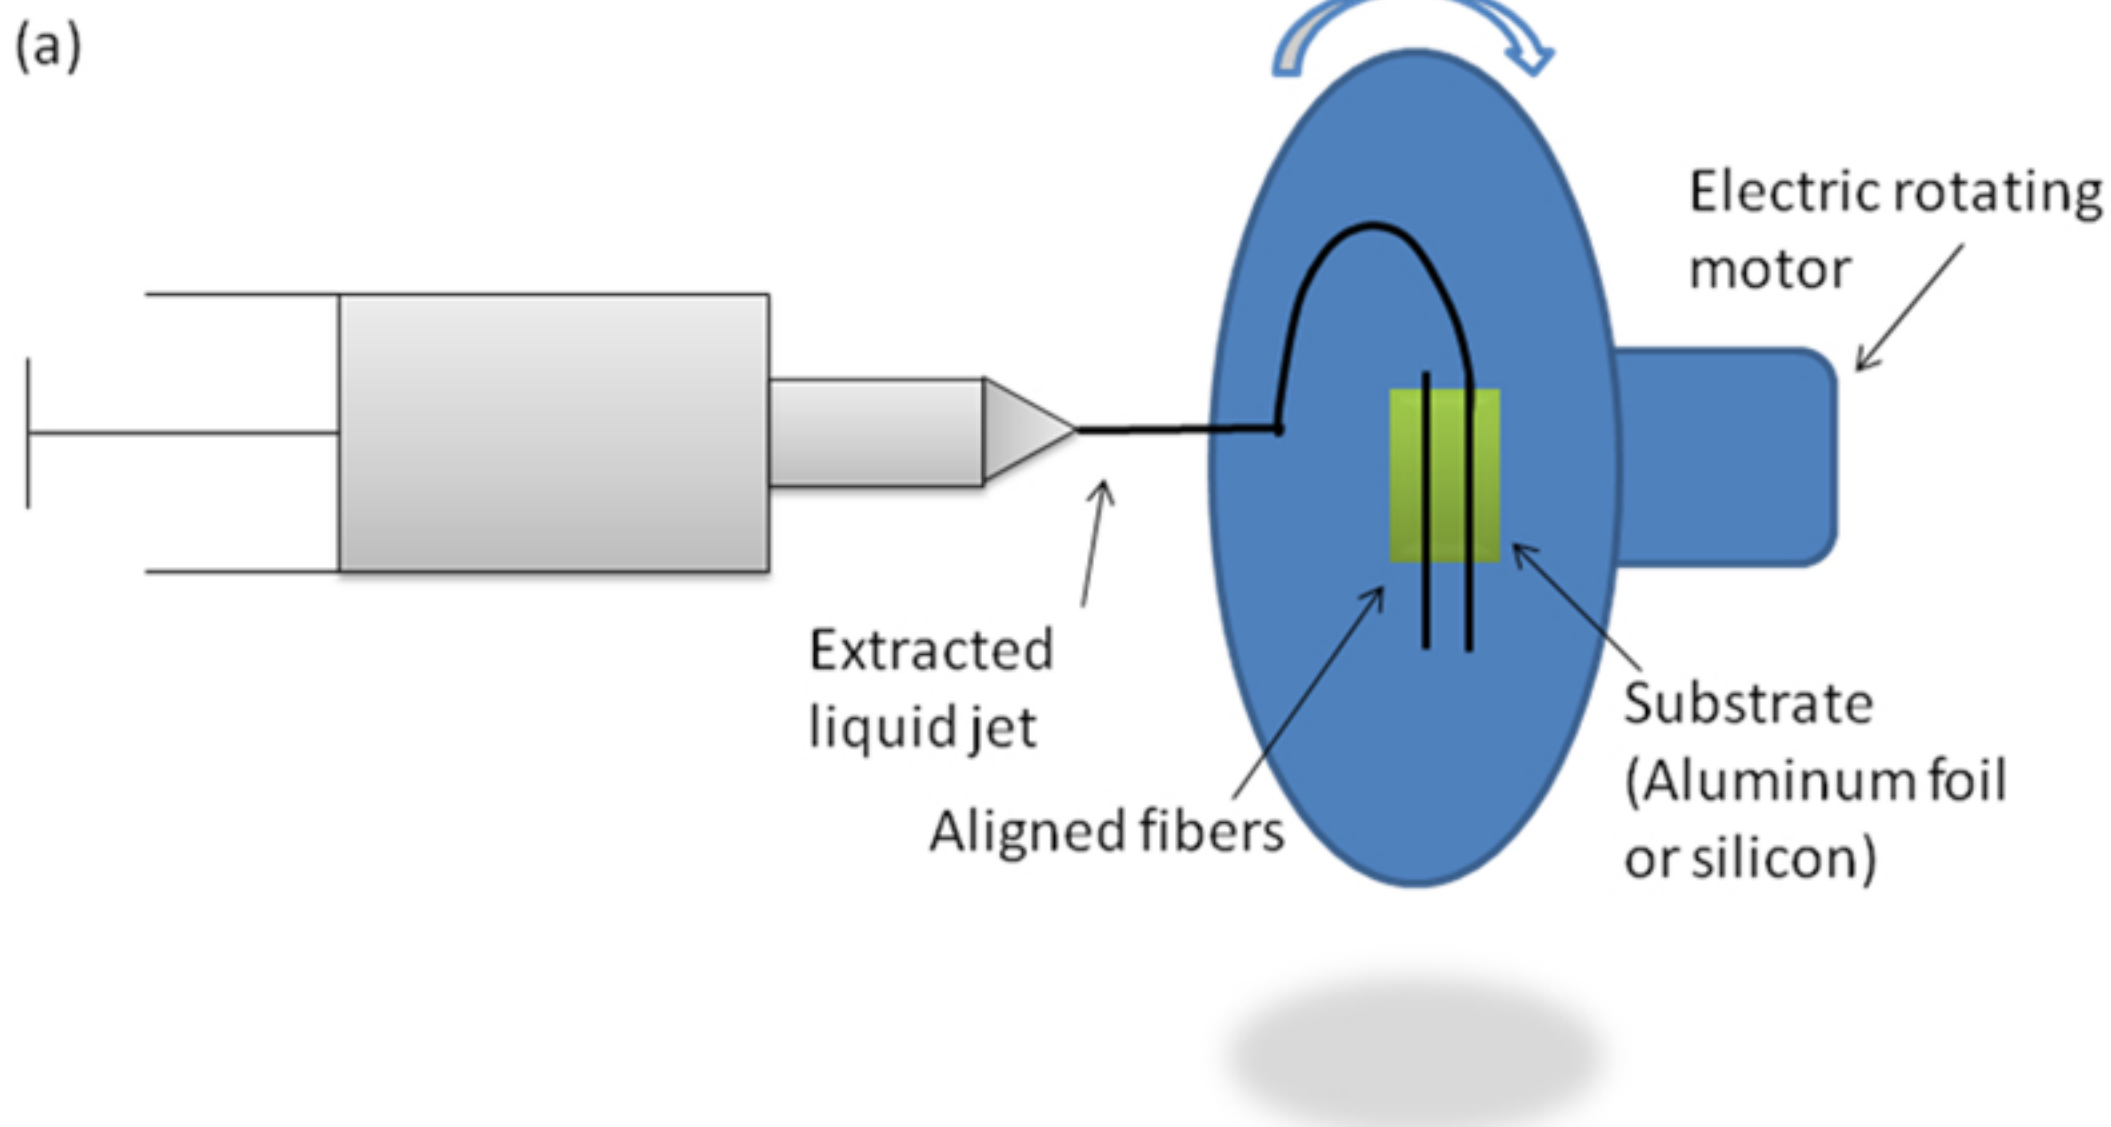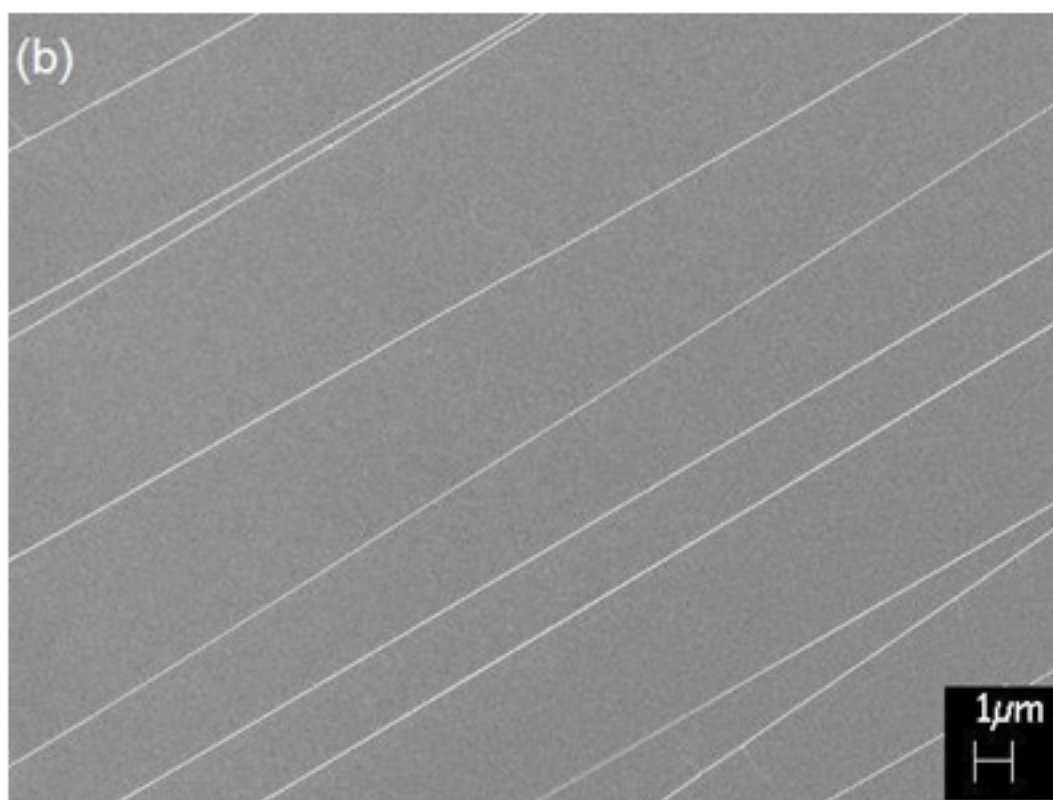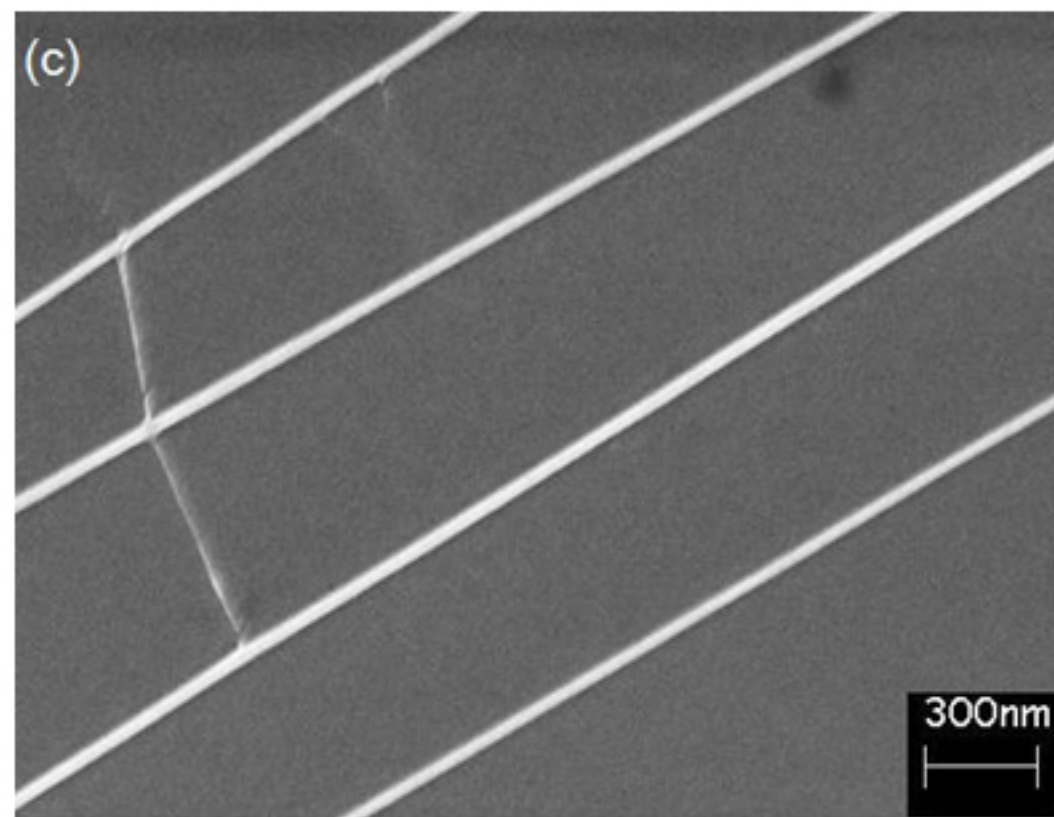

**Figure 5.3** (a) Schematic diagram of scanning electrospinning set-up (b) and (c) SEM images of aligned  $\text{ZrO}_2$  nanofibers fabricated by scanning electrospinning

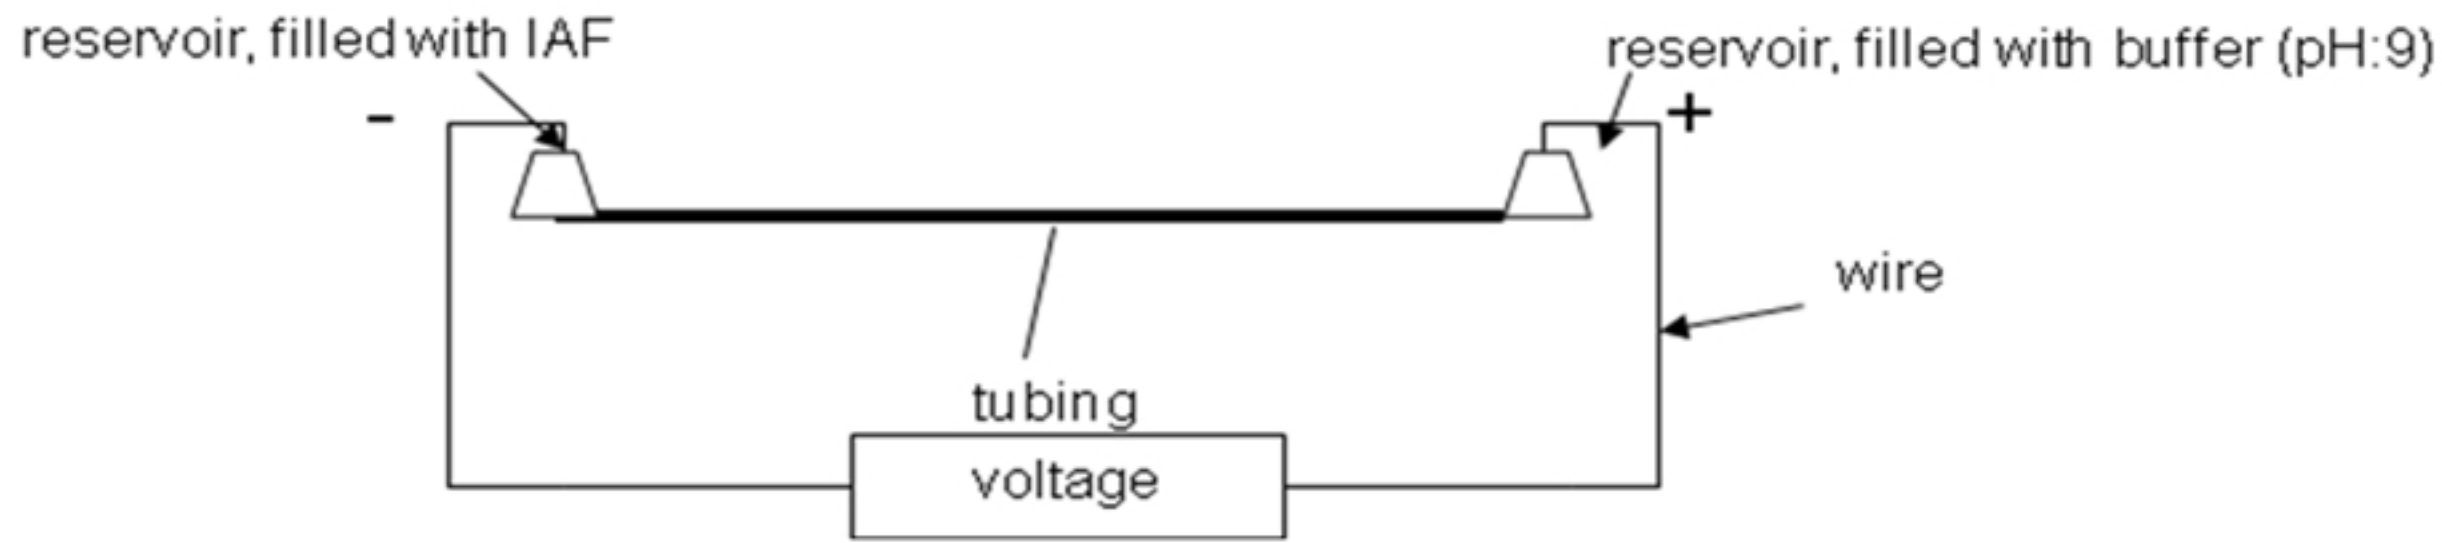

**Figure 5.15** Schematic diagram of experiment setup for electrokinetic effect in nanofluidic tubing.

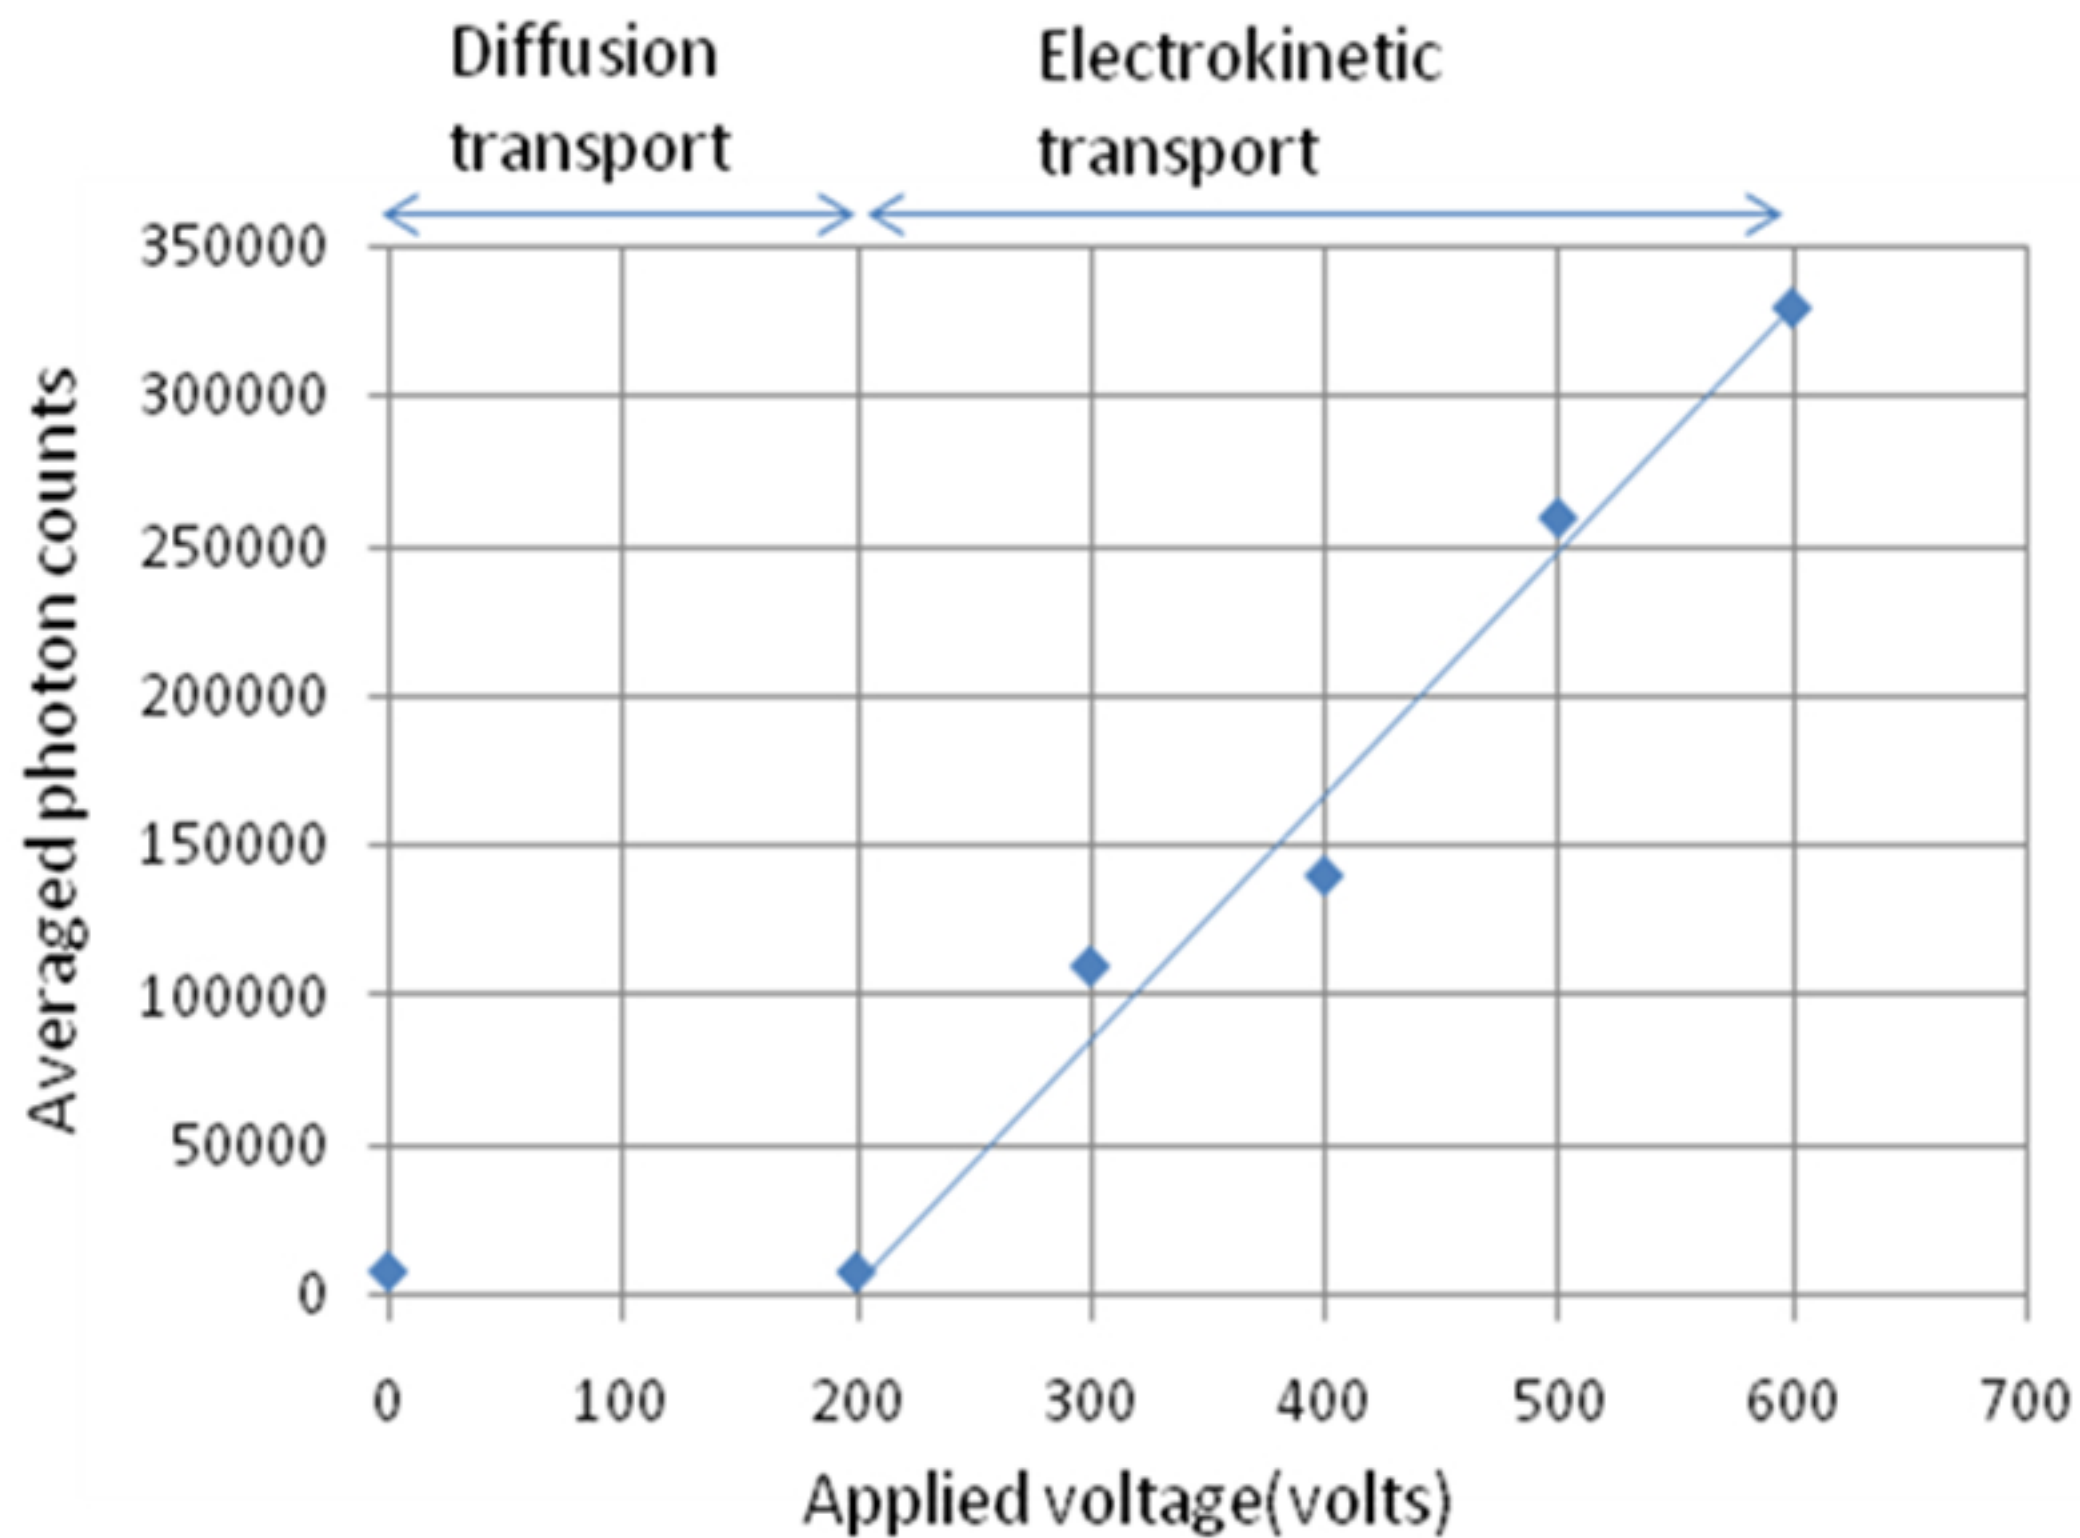

**Figure 5.17** Averaged photon counts (collected over a period of 10 seconds) for a 4.9  $\mu\text{M}$  IAF solution in fused-silica nanofluidic tubing versus applied voltage.

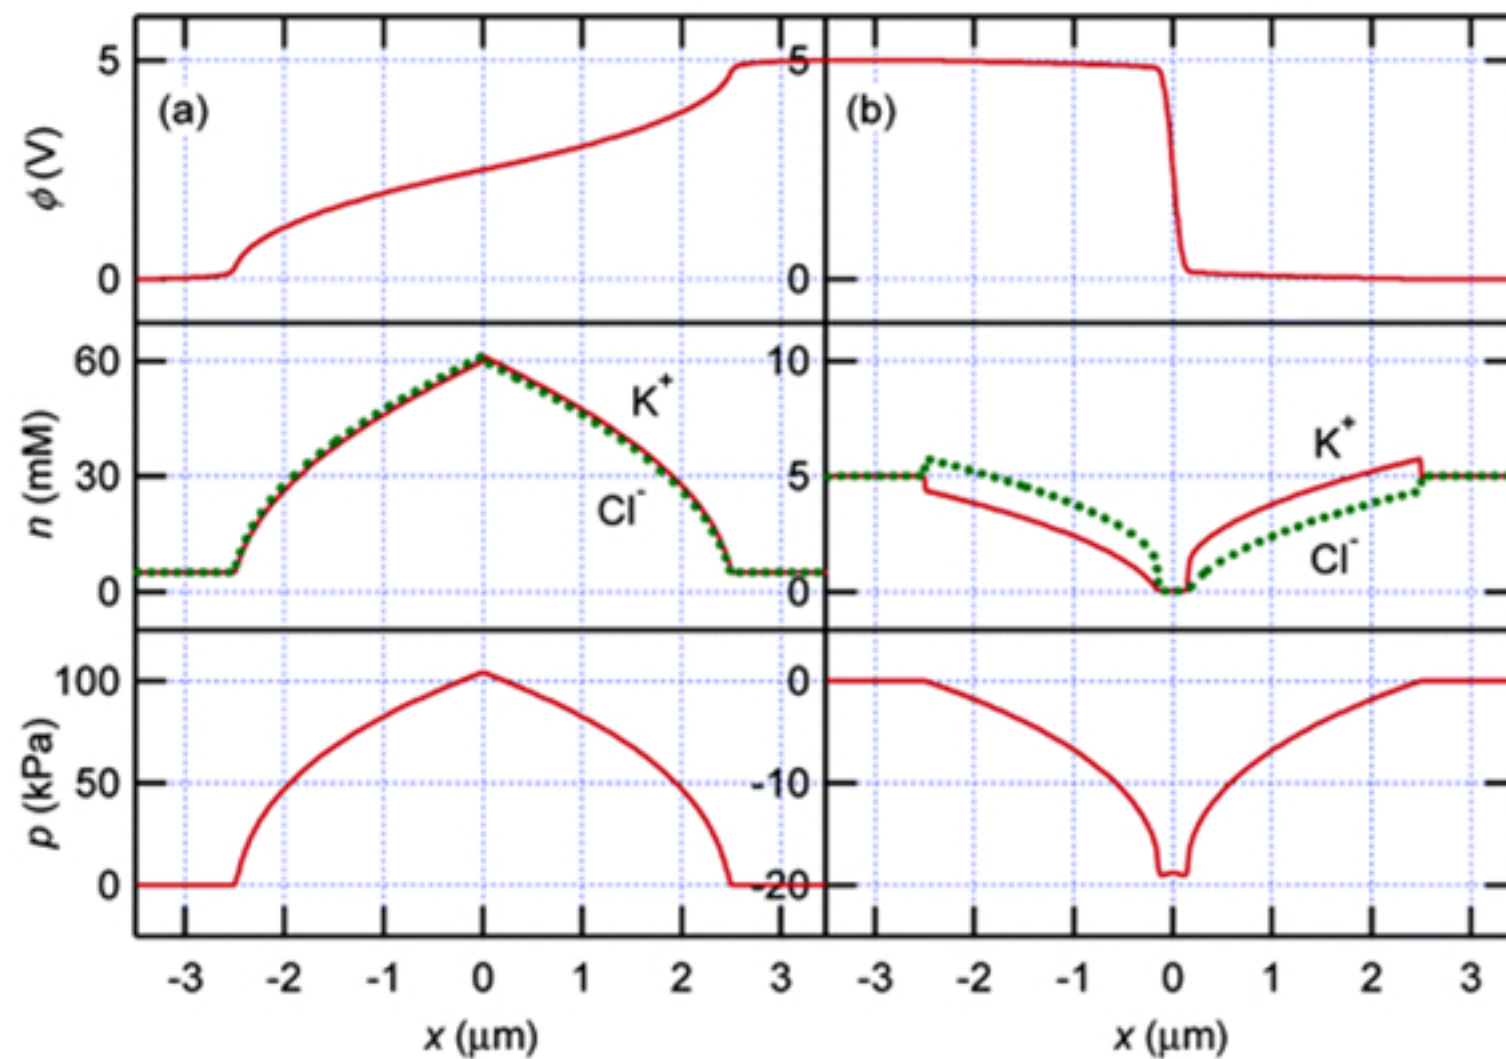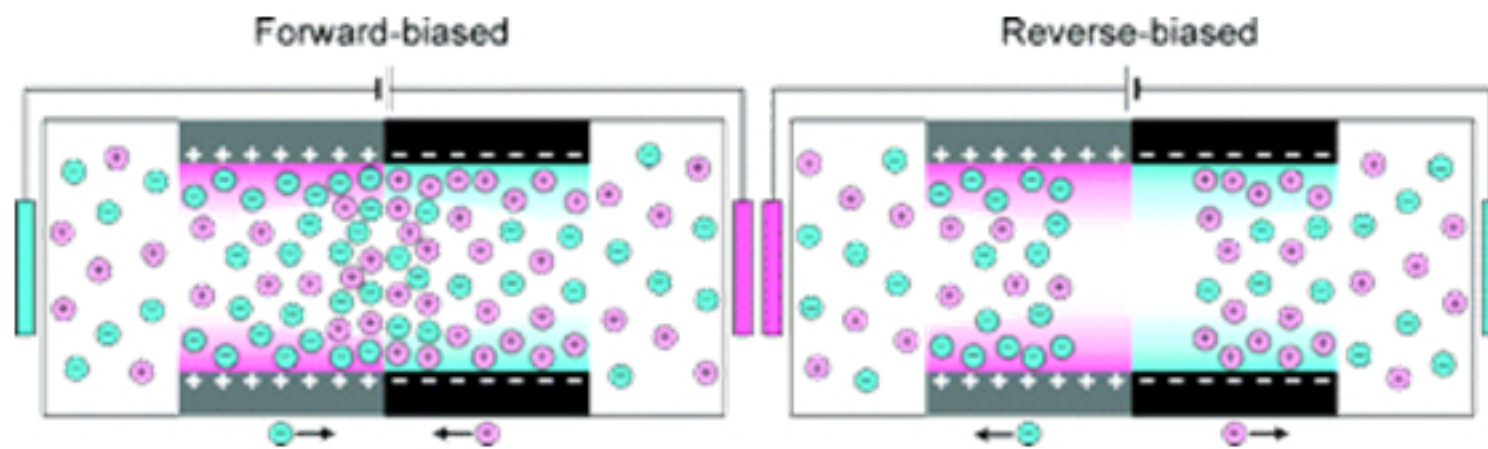

**Figure 8.10** Electric potential (along channel center), ion concentration (averaged over the channel height) and pressure profiles (along channel center) for (a) a forward bias of 5 V and (b) a reverse bias of 5 V. The surface charge densities at the left and right halves of the channel are assumed to be 2 and -2 mC/m<sup>2</sup>, respectively. The bulk concentration is 5 mM. Device schematics at the bottom show that ions accumulate at the junction under forward bias, but deplete from the junction under reverse bias. Adapted from B. Lovrecek *et al.*, *Phys. Chem.*, 1959, 63, 750 and reproduced with permission.
